# Supplementary material
Source: PubMed Central journal article supplement (PMC3831573)
Supplement: NIHMS55565-supplement-01.pdf [file NIHMS55565-supplement-01.pdf]

Type of file: figure

Label: suppl\_figure

Filename: suppl\_figure\_james\_nov.pdf

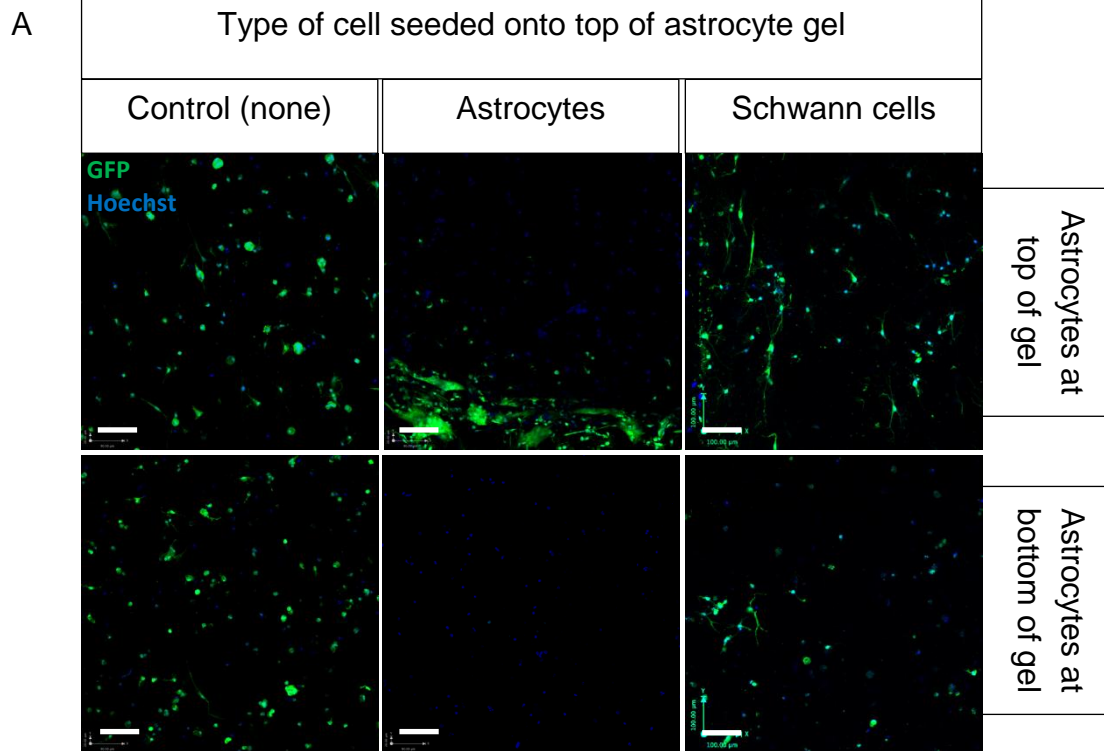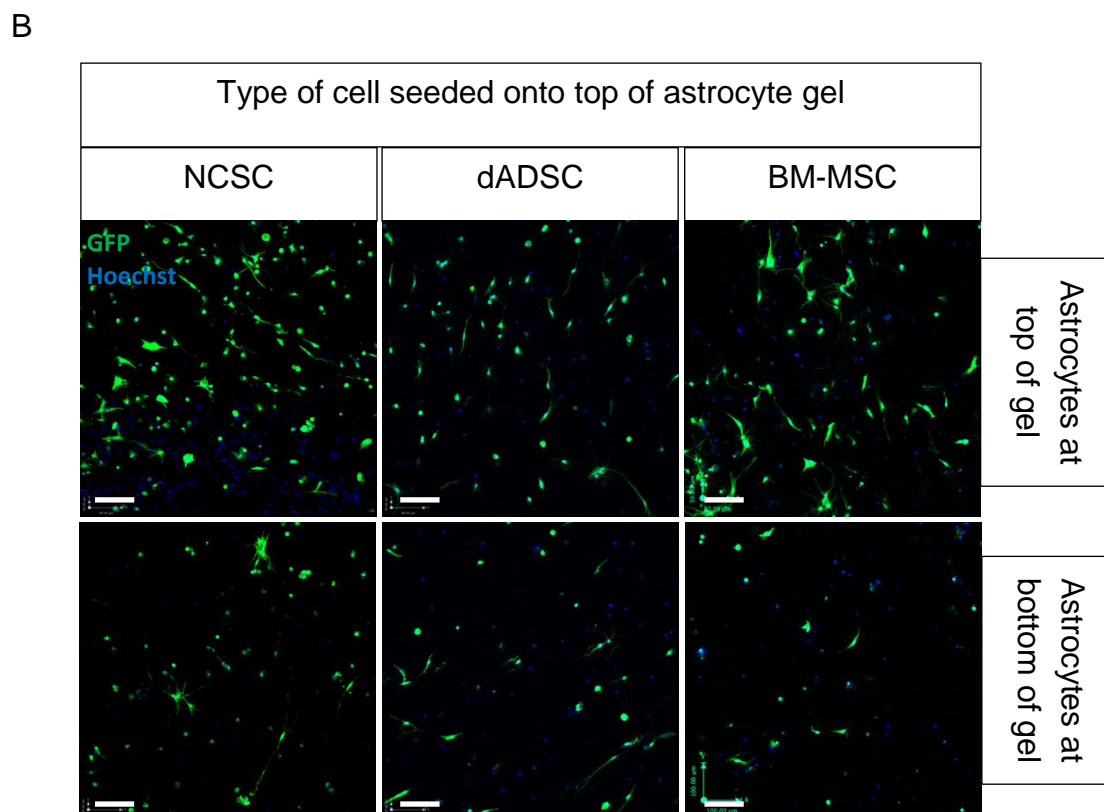

Supplementary Figure 1: GFP expression was used to distinguish astrocytes within the gels from cells seeded on the surface. Images are confocal micrographs corresponding to the GFAP immunoreactivity panels shown in Figure 2 (A) and Figure 3 (B). In most cases the astrocytes within the gel were the GFP positive population, but in some experiments this was reversed (an example is shown in (A) where the centre panel shows GFP positive astrocytes seeded onto a gel containing wild type astrocytes). Scale bars 100  $\mu$ m.

Type of file: table

Label: suppl\_table

Filename: suppl\_table\_james\_nov.docx

|               | Control      | Schwann cells | NCSC          | dADSC       | BM-MSc      |
|---------------|--------------|---------------|---------------|-------------|-------------|
| Top of gel    | 119.2 ± 18.4 | 72.6 ± 7.3    | 184.5 ± 13.5  | 67.57 ± 7.3 | 65.7 ± 6.8  |
| Bottom of gel | 89.6 ± 8.54  | 85.3 ± 12.6   | 133.3 ± 11.56 | 59.31 ± 4.8 | 81.7 ± 15.2 |

Supplementary table 1: summary of the astrocyte number present in each test volume used for analysis. Data are means ± SEM for the number of astrocyte nuclei. Astrocytes within the gels were distinguished from cells seeded on the surface using GFP. There were no significant differences between treatment groups and controls (Kruskal-Wallis test).
